# Supplementary material for: Adaptation of influenza A (H7N9) virus in primary human airway epithelial cells
Source: PubMed Central journal article supplement (PMC5595892; doi:10.1038/s41598-017-10749-5), 2017-09-12

1 **Adaptation of influenza A (H7N9) virus in primary human airway epithelial cells**

2

3 Daniel Tsung-Ning Huang<sup>1,2</sup> ¶, Chun-Yi Lu<sup>3¶</sup>, Ya-Hui Chi<sup>4</sup>, Wan-Ling Li<sup>3</sup>, Luan-Yin  
4 Chang<sup>3</sup>, Mei-Ju Lai<sup>3</sup>, Jin-Shing Chen<sup>5</sup>, Men-Ming Hsu<sup>6</sup>, Li-Min Huang<sup>3\*</sup>

5

6 <sup>1</sup>Department of Pediatric Infectious Diseases, MacKay Children's Hospital, Taipei,

7 Taiwan

8 <sup>2</sup> Department of Medicine, Mackay Medical College, New Taipei City, Taiwan

9 <sup>3</sup>Department of Pediatrics, National Taiwan University Children's Hospital, National

10 Taiwan University College of Medicine, Taipei, Taiwan

11 <sup>4</sup>Institute of Biotechnology and Pharmaceutical Research, National Health Research

12 Institutes, Zhunan, Taiwan

13 <sup>5</sup>Department of Thoracic Surgery, National Taiwan University Hospital, National

14 Taiwan University College of Medicine, Taipei, Taiwan

15 <sup>6</sup>Department of Surgery, National Taiwan University Hospital, National Taiwan

16 University College of Medicine, Taipei, Taiwan

17

18 \*Corresponding author

19 E-mail: [lmhuang@ntu.edu.tw](mailto:lmhuang@ntu.edu.tw) (LMH)

20

21 ¶These authors contributed equally to this work.

22

23 .

24

25

26 **Additional Information**

27 **Supplementary information** accompanies this paper at <http://www.nature.com/srep>

28 **Competing financial interests:** The authors declare no competing financial interests.

29

30

31 **Supporting information**

32 **Supp Fig. Amino acid point mutations in HA, NA, NP, and PB2 after serial**

33 **passage of influenza A(H7N9) virus in hAECs.**

34

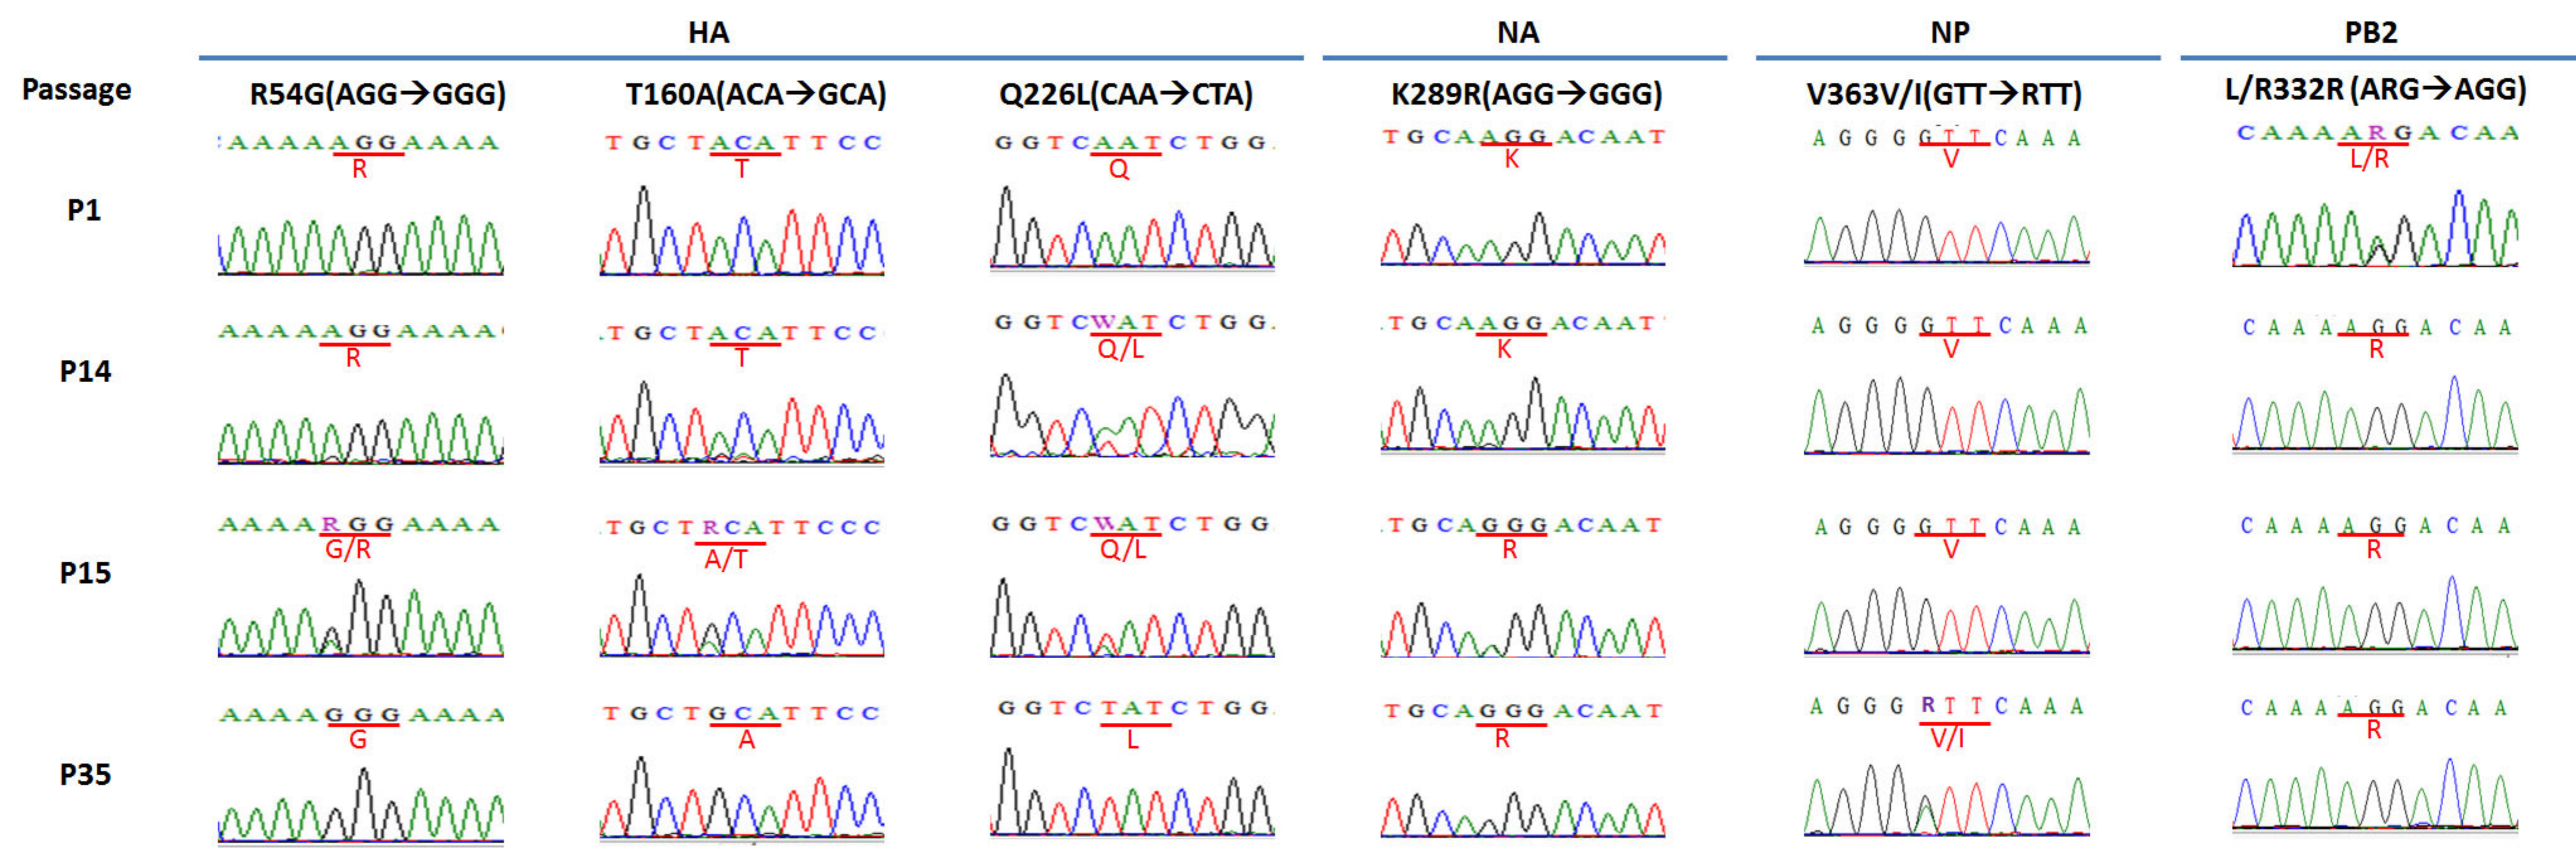

Supplement: 41598_2017_10749_MOESM1_ESM.pdf [file 41598_2017_10749_MOESM1_ESM.pdf]
